# Supplementary material for: Cytoplasmic dynein-1 cargo diversity is mediated by the combinatorial assembly of FTS–Hook–FHIP complexes
Source: PubMed Central journal article supplement (PMC8730729; doi:10.7554/elife.74538), 2021-12-09
Supplement: elife-74538-fig1-figsupp1-data1.pdf [file elife-74538-fig1-figsupp1-data1.pdf]

CTRL  
FHIP1A  
FHIP1B  
FHIP2A  
FHIP2B  
Hook2

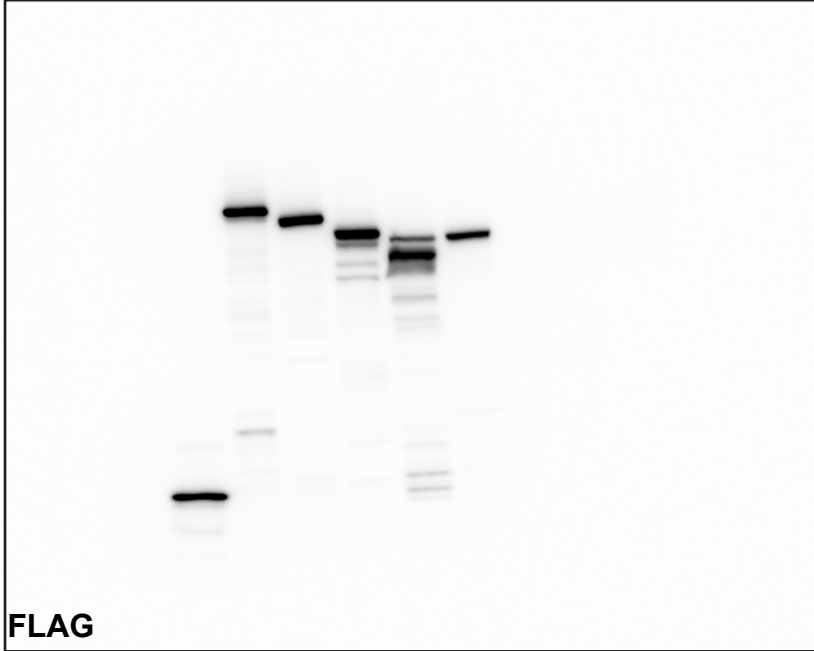

Raw image: Fig1supp1A.scn
