# Supplementary material for: Cytoplasmic dynein-1 cargo diversity is mediated by the combinatorial assembly of FTS–Hook–FHIP complexes
Source: PubMed Central journal article supplement (PMC8730729; doi:10.7554/elife.74538), 2021-12-09
Supplement: elife-74538-fig2-figsupp1-data1.pdf [file elife-74538-fig2-figsupp1-data1.pdf]

CTRL Hook1 Hook2 Hook3  
CTRL Hook1 Hook2 Hook3

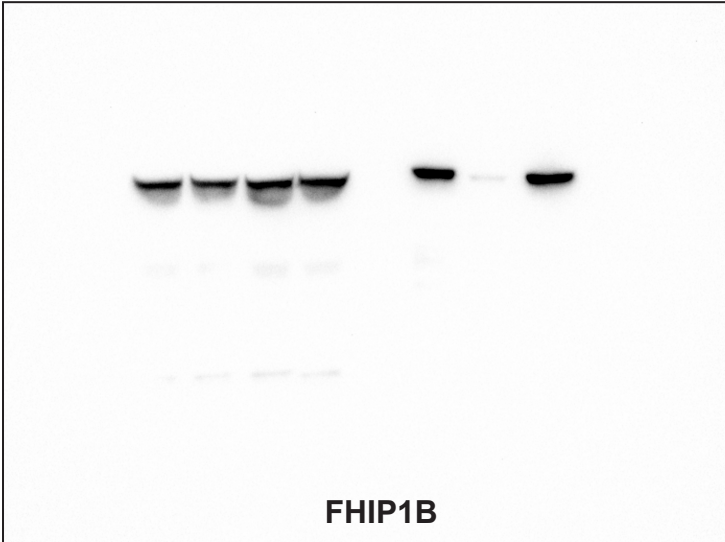

**FHIP1B**

Raw image: Fig2supp1\_FHIP1B.scn

CTRL Hook1 Hook2 Hook3  
CTRL Hook1 Hook2 Hook3

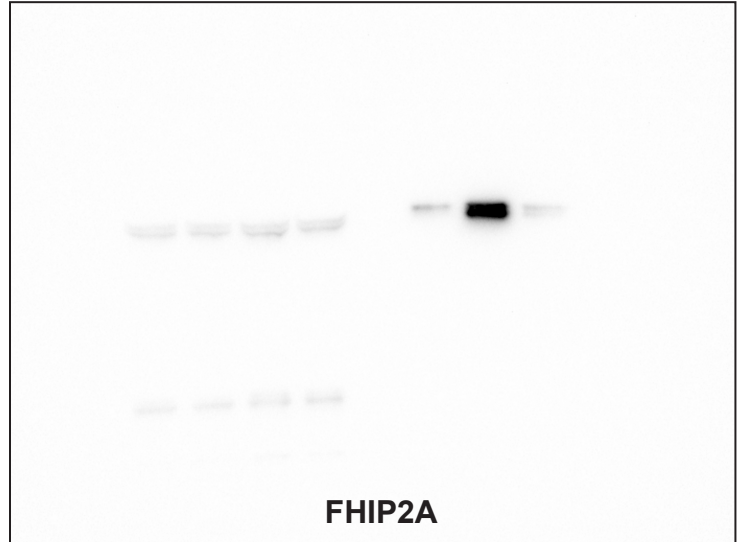

**FHIP2A**

Raw image: Fig2supp1\_FHIP2A.scn

CTRL Hook1 Hook2 Hook3  
CTRL Hook1 Hook2 Hook3

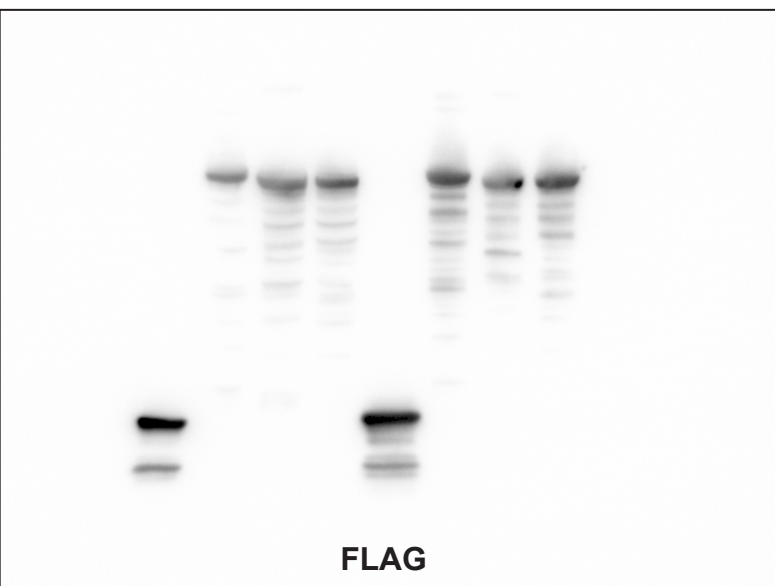

**FLAG**

Raw image: Fig2supp1\_FLAG.scn

CTRL Hook1 Hook2 Hook3  
CTRL Hook1 Hook2 Hook3

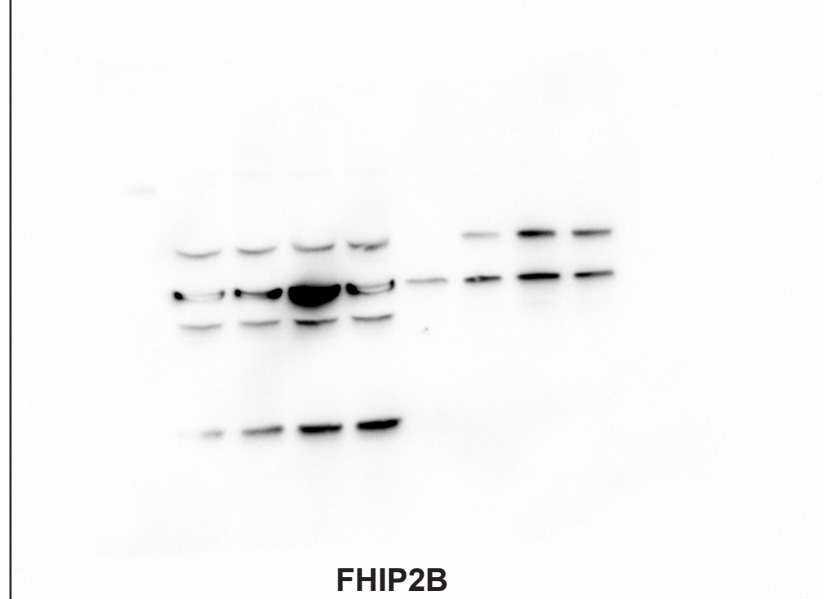

**FHIP2B**

Raw image: Fig2supp1\_FHIP2B.scn
