# Supplementary material for: Cytoplasmic dynein-1 cargo diversity is mediated by the combinatorial assembly of FTS–Hook–FHIP complexes
Source: PubMed Central journal article supplement (PMC8730729; doi:10.7554/elife.74538), 2021-12-09
Supplement: elife-74538-fig4-data1.pdf [file elife-74538-fig4-data1.pdf]

CTRL  
FHIP1B KO #1  
FHIP1B KO #2  
FHIP2A KO #1  
FHIP2A KO #2

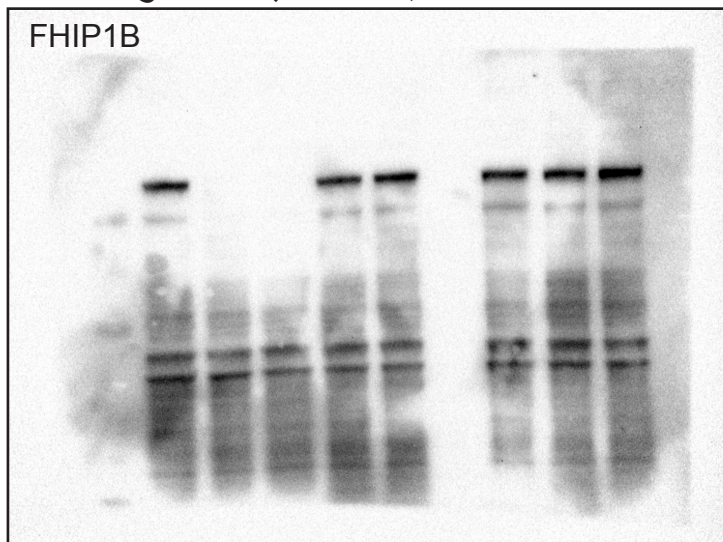

Raw image: Fig4B\_FHIP1B.scn

CTRL  
FHIP1B KO #1  
FHIP1B KO #2  
FHIP2A KO #1  
FHIP2A KO #2

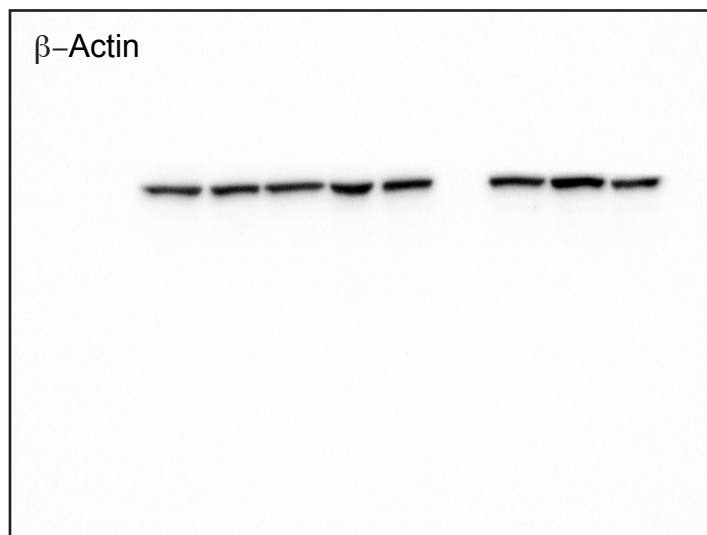

Raw image: Fig4B\_Actin.scn

CTRL  
FHIP1B KO #1  
FHIP1B KO #2  
FHIP2A KO #1  
FHIP2A KO #2

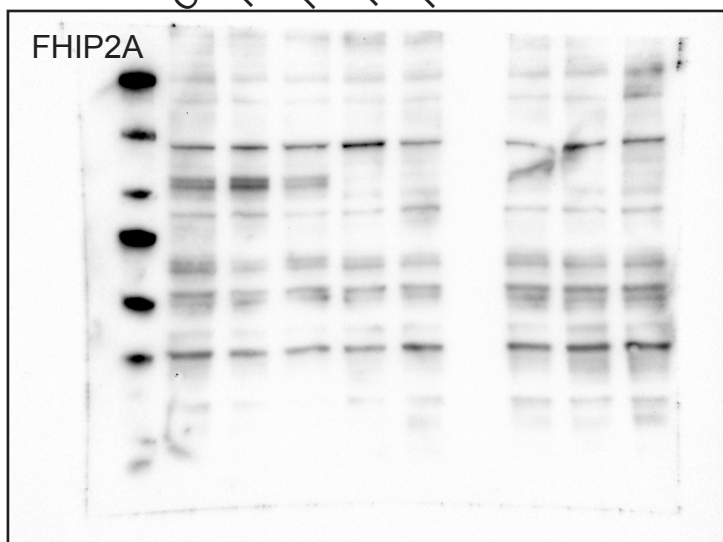

Raw image: Fig4B\_FHIP2A.scn
