# Supplementary material for: Cytoplasmic dynein-1 cargo diversity is mediated by the combinatorial assembly of FTS–Hook–FHIP complexes
Source: PubMed Central journal article supplement (PMC8730729; doi:10.7554/elife.74538), 2021-12-09
Supplement: elife-74538-fig4-figsupp1-data1.pdf [file elife-74538-fig4-figsupp1-data1.pdf]

**A**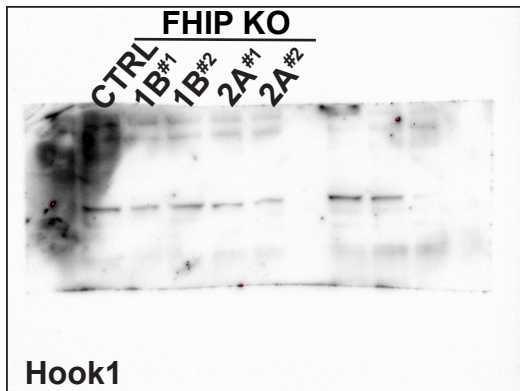

Raw image: Fig4supp1A\_Hook1.scn

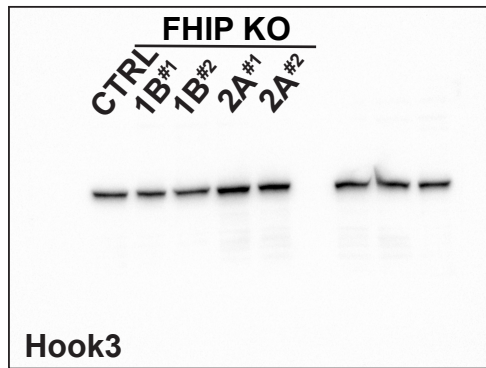

Raw image: Fig4supp1A\_Hook3.scn

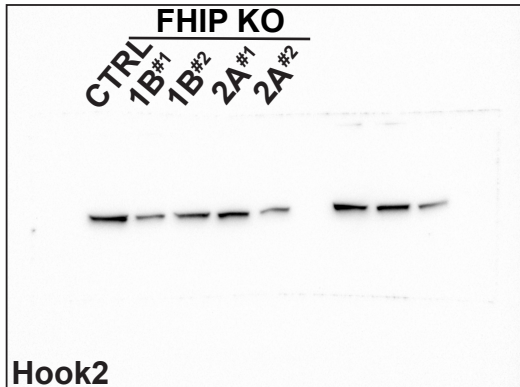

Raw image: Fig4supp1A\_Hook2.scn

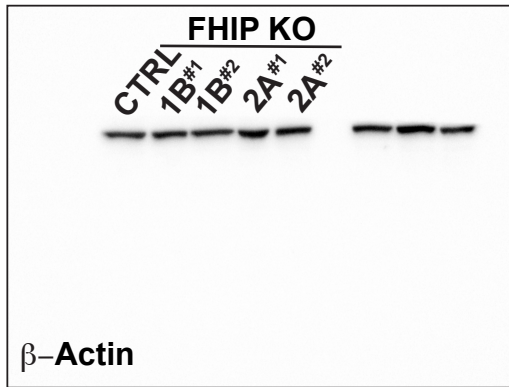

Raw image: Fig4supp1A\_Actin.scn

**B**

|   |   | FHIP KO |    |    |    |    |                  |
|---|---|---------|----|----|----|----|------------------|
|   |   | CTRL    | 1B | 1B | 2A | 2A |                  |
| + | + | -       | +  | -  |    |    | tagRFP-V5        |
| - | - | +       | -  | -  |    |    | FHIP1B-tagRFP-V5 |
| - | - | -       | -  | +  |    |    | FHIP2A-tagRFP-V5 |
| 1 | 2 | 3       | 4  | 5  |    |    |                  |

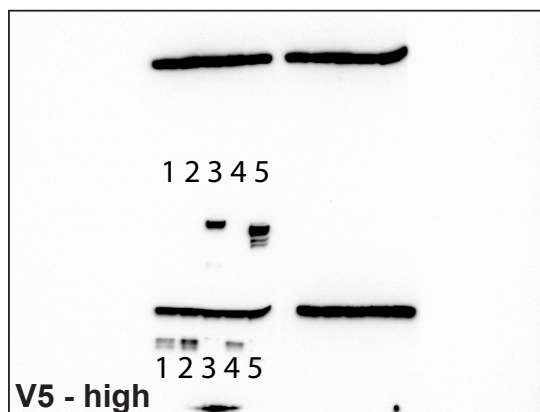

Raw image: Fig4supp1B\_V5\_high.scn

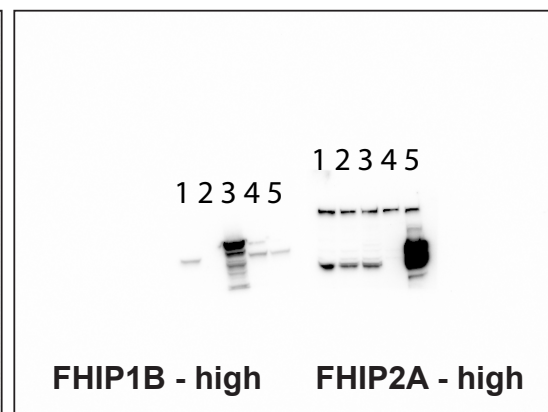

Raw image: Fig4supp1B\_FHIP1B\_FHIP2A\_high.scn

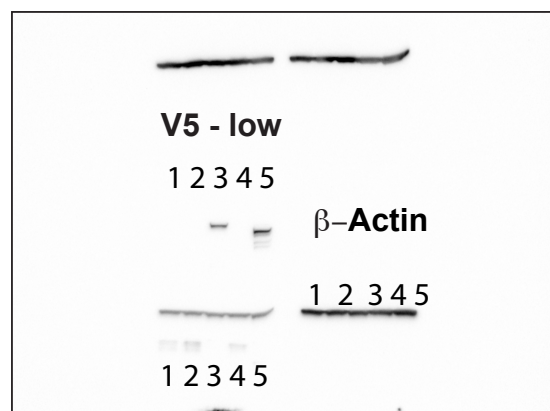

Raw image: Fig4supp1B\_Actin\_V5\_low.scn

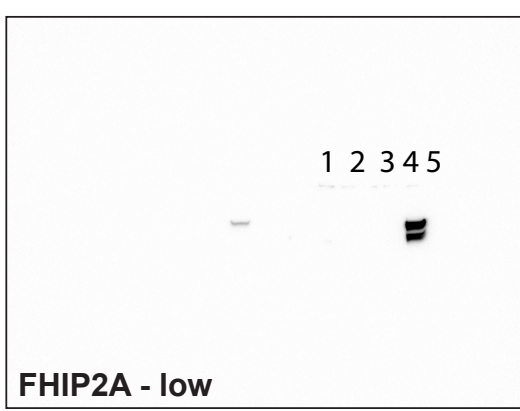

Raw image: Fig4supp1B\_FHIP2A\_low.scn

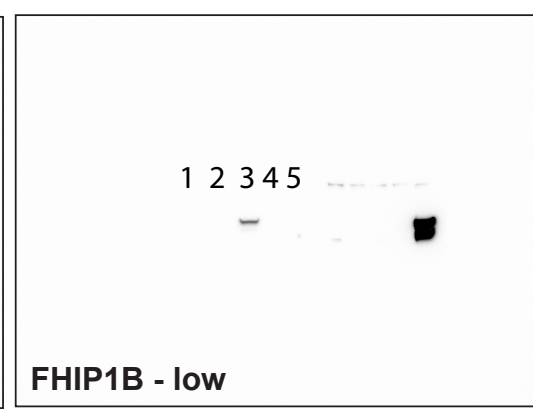

Raw image: Fig4supp1B\_FHIP1B\_low.scn
