# Supplementary material for: Cytoplasmic dynein-1 cargo diversity is mediated by the combinatorial assembly of FTS–Hook–FHIP complexes
Source: PubMed Central journal article supplement (PMC8730729; doi:10.7554/elife.74538), 2021-12-09
Supplement: elife-74538-fig5-data1.pdf [file elife-74538-fig5-data1.pdf]

**F**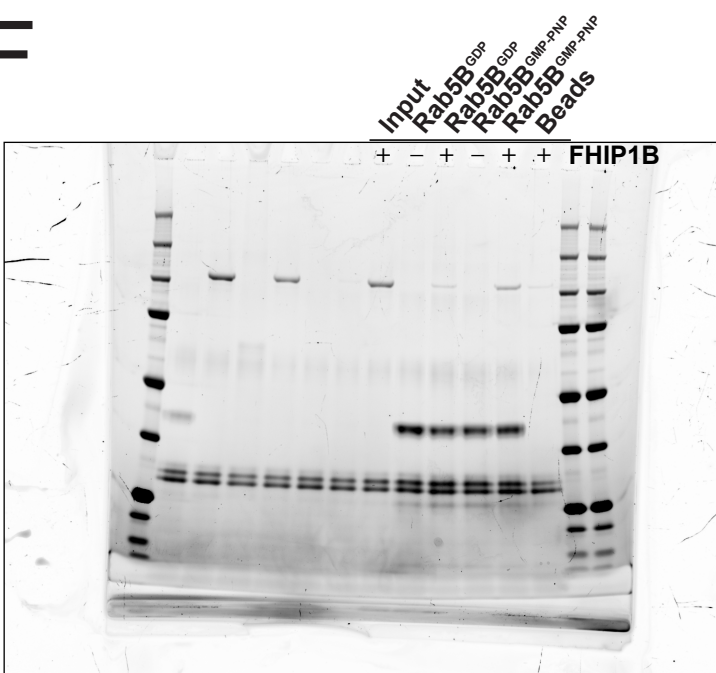

Raw image: Fig5F.scn

**G**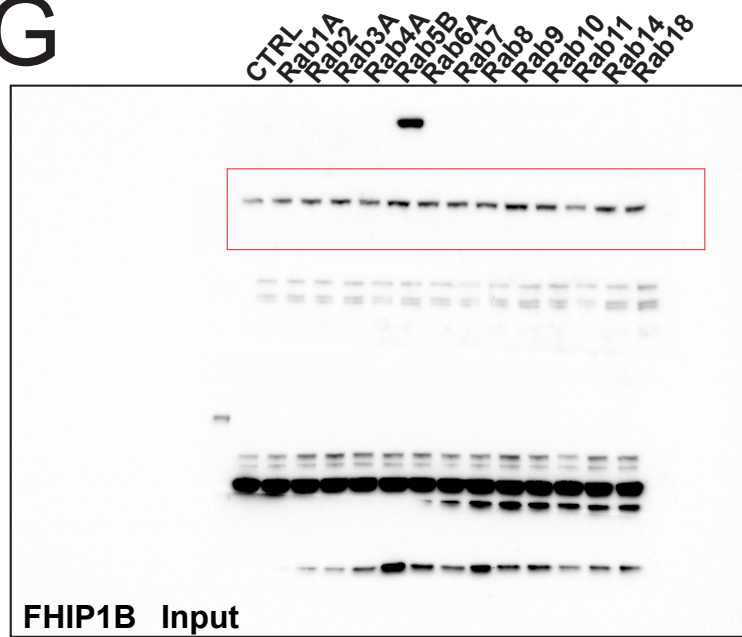

Raw image: Fig5G\_FHIP1Binput.scn

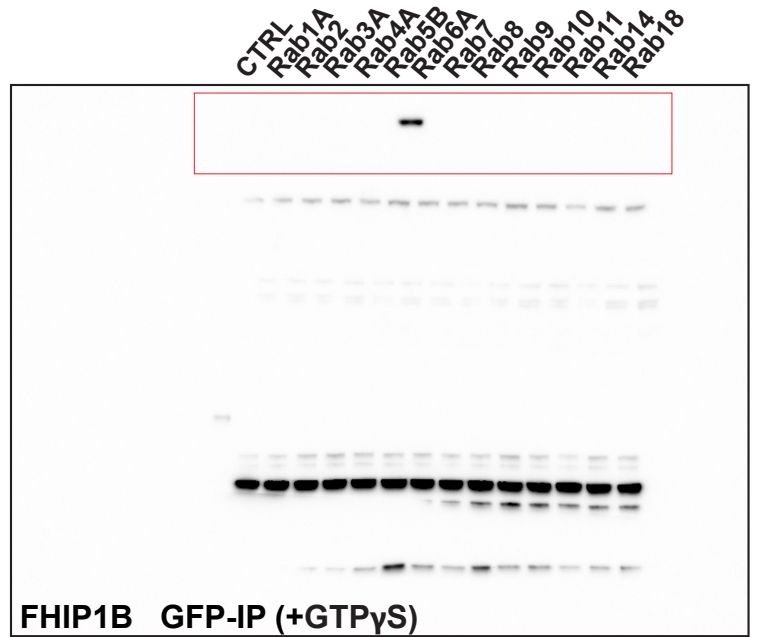

Raw image: Fig5G\_FHIP1BIP.scn

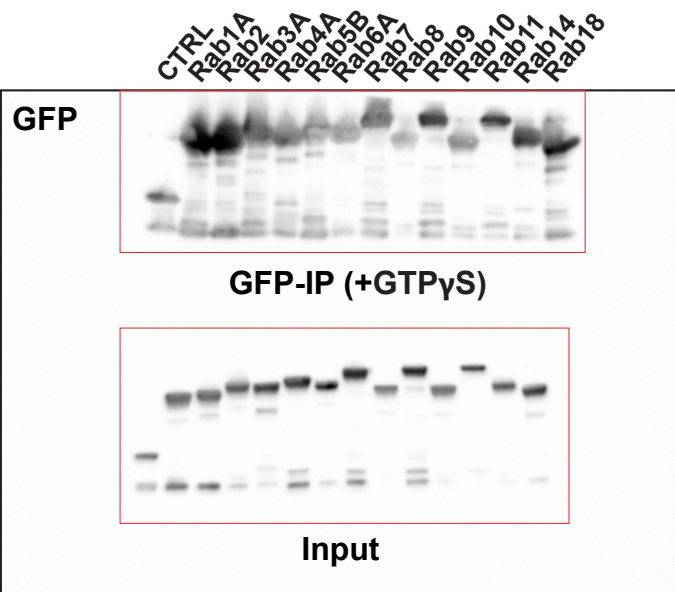

Raw image: Fig5G\_GFP.scn
