# Supplementary material for: Cytoplasmic dynein-1 cargo diversity is mediated by the combinatorial assembly of FTS–Hook–FHIP complexes
Source: PubMed Central journal article supplement (PMC8730729; doi:10.7554/elife.74538), 2021-12-09
Supplement: elife-74538-fig6-figsupp3-data1.pdf [file elife-74538-fig6-figsupp3-data1.pdf]

**A**

CTRL  
Rab1A(WT)  
Rab1A(Q70L)  
CTRL  
Rab1A(WT)  
Rab1A(Q70L)

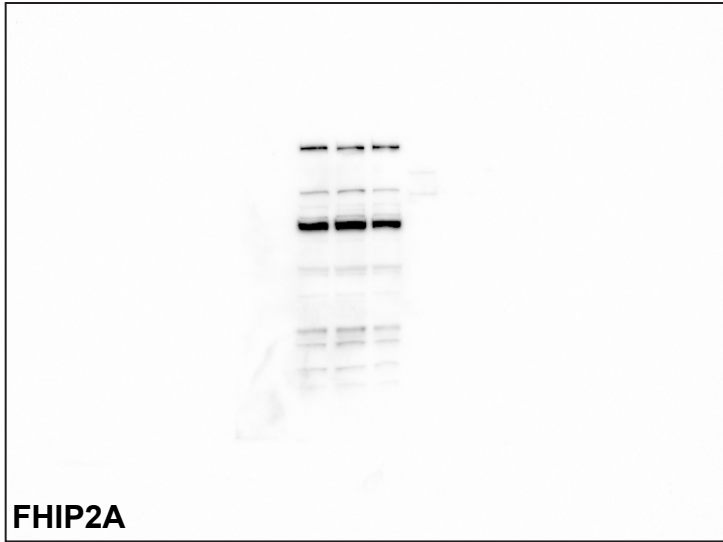

Raw image: Fig6supp3A\_FHIP1B.scn

CTRL  
Rab1A(WT)  
Rab1A(Q70L)  
CTRL  
Rab1A(WT)  
Rab1A(Q70L)

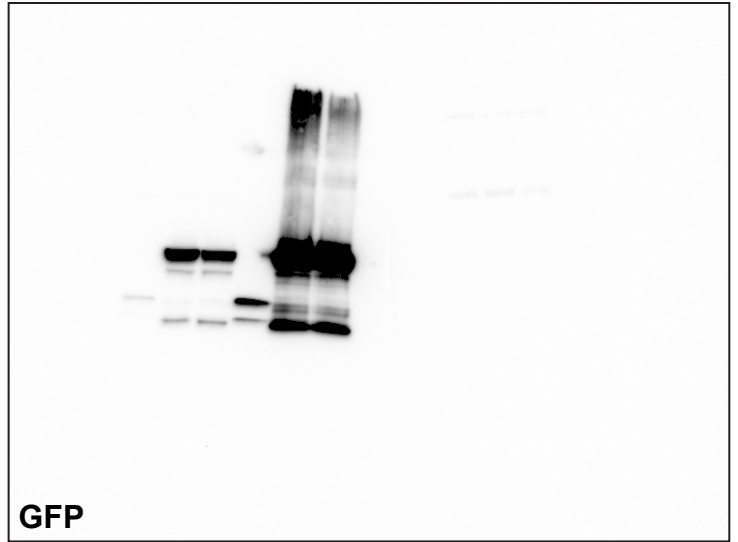

Raw image: Fig6supp3A\_GFP.scn

**B**

CTRL  
Rab1A  
Rab2  
Rab3A  
Rab4A  
Rab5B  
Rab6A  
Rab7  
Rab8  
Rab9  
Rab10  
Rab11  
Rab14  
Rab18

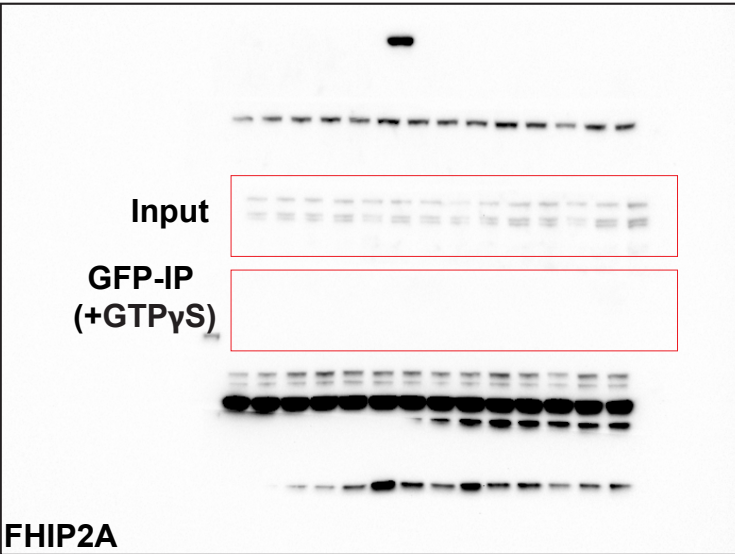

Raw image: Fig5G\_FHIP1BIP.scn

CTRL  
Rab1A  
Rab2  
Rab3A  
Rab4A  
Rab5B  
Rab6A  
Rab7  
Rab8  
Rab9  
Rab10  
Rab11  
Rab14  
Rab18

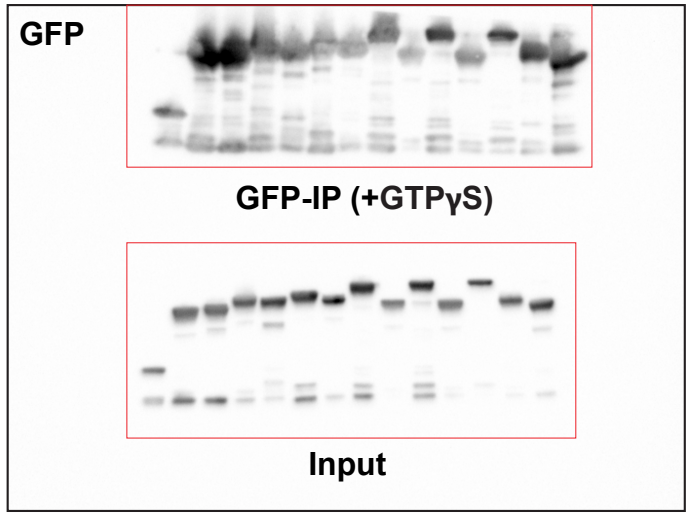

Raw image: Fig5G\_GFP.scn
