# Supplementary material for: Cytoplasmic dynein-1 cargo diversity is mediated by the combinatorial assembly of FTS–Hook–FHIP complexes
Source: eLife. 2021 Dec 9;10:e74538. doi: 10.7554/eLife.74538 (PMC8730729; doi:10.7554/eLife.74538)
Supplement: Supplementary file 3. — The first tab corresponds to the comparison between FHIP1A, FHIP1B, FHIP2A, and FHIP2B carboxy-terminal BioID2 datasets shown in a Venn diagram in Figure 1—figure supplement 1B. The following four tabs correspond to the comparison between individual FHIP carboxy-terminal BioID2 datasets with Hook carboxy-terminal BioID2 datasets shown in Figure 1—figure supplement 2. The Hook1 and Hook3 carboxy-terminal datasets are from Redwine et al., 2017. [file elife-74538-supp3.xlsx]

## Sheet: FHIPComparison
Comaprison of different FHIP BioID datasets used to make Figure 1 - Figure supplement 1B
Dataset	total	NCBI_Gene
FHIP1A vs. FHIP1B vs. FHIP2A vs. FHIP2B	5	AKTIP	HOOK3	HOOK1	IGF2R	SHMT2
FHIP1A vs. FHIP1B vs. FHIP2A	3	LNPEP	SCAMP1	ERC1
FHIP1A vs. FHIP1B vs. FHIP2B	1	SSBP1
FHIP1A vs. FHIP2A vs. FHIP2B	5	KLC1	KLC4	KLC2	KIF5B	KIF5C
FHIP1B vs. FHIP2A vs. FHIP2B	2	DBT	HRNR
FHIP1A vs. FHIP1B	8	ECE1	SNX1	ATP9A	FAM160A2	FAM135A	AP4E1	APPL1	SNX3
FHIP1A vs. FHIP2A	3	PCCA	CLEC16A	SLC38A1
FHIP1A vs. FHIP2B	5	FMC1	ANKRD27	FASTKD5	KLC3	FAM160A1
FHIP1B vs. FHIP2A	4	FLG2	EMD	ESRRB	BRWD1
FHIP1B vs. FHIP2B	11	ECHS1	TIMM44	NDUFS1	DLST	PTCD3	MRPS9	PYCR2	NDUFS3	MRPS31	CLPX	NME4
FHIP2A vs. FHIP2B	16	FAU	FAM160B1	CPD	KIAA0319L	GOLGA5	HOOK2	BSDC1	OCIAD1	TBC1D23	HSPE1	FAM91A1	GOLGA4	KIF1B	ATAD3A	ATP2C1	RIMBP3
FHIP1A	25	SCAMP3	VBP1	LGALS3BP	SLC39A14	HELZ	SLC7A5	ATP5C1	SNX2	PFDN1	ARFGAP2	PFDN6	GAPDH	CDC42EP1	TFRC	DNAJB6	PFDN5	ALG1	LRP2	LPCAT1	PCCB	TMEM161A	UQCRC2	RAB11FIP1	ATP1A1	TOP1
FHIP1B	76	UBR5	DECR1	ZFPM2	AP4B1	MRPS35	TNKS2	TRIM33	GSN	ZNF281	ZMYM2	EPN2	KMT2D	BLM	ASPM	IRF2BP2	AP4M1	BRCA2	PTBP2	YEATS4	UBN1	TPM4	EXO1	TSHZ1	MYH10	KIAA1551	MYO5A	SPEN	NCOR2	MYL12A	TPM1	PYCR1	BCL11A	FANCM	TPM3	SLC6A15	PRDM16	RAD54L2	STEAP3	TMOD2	LGALS8	GSE1	TSHZ3	SCIN	FAM208A	ZBTB21	MYL6B	DLAT	BEND3
FHIP2A	73	TPD52	GOSR2	SLC30A5	NBN	TBC1D4	SUMO1	MRPS28	KRT14	RNF40	KRT9	STOM	SNAP47	WDR11	TPD52L2	KRT77	VLDLR	RPL36A	BET1L	VANGL1	LRBA	BRPF1	KRT1	SLC38A2	RPL35	DDRGK1	CASP14	ATP6V0A2	CEP350	ARG1	ZFYVE27	NBEA	SEC24B	KRT5	ARHGAP1	RAB6A	SBSN	SLC30A7	TOP2B	DVL1	FABP5	MED19	SCFD1	VAMP7	KPRP	DSG1	STX5	APC	TPD52L1
FHIP2B	113	USP30	SUPV3L1	NDUFS6	PDHA1	NDUFS2	GFM2	POLRMT	RPS18	MRPS7	GLS	GLUD1	VAPB	SREK1IP1	CHCHD3	AARS2	PDK1	NDUFA6	NDUFAF4	PPA2	DLD	ATP5F1B	ACADM	ECH1	IARS2	MRPL3	ACAD9	LDHA	PTPMT1	ACSL3	TRAK1	NDUFA12	PTCD1	NDUFA9	HADHA	AKAP1	GFM1	YBX3	C17orf80	NDUFAF2	PRPS1	MRPS22	ST13	HSPA9	WARS2	RRP1	LRPPRC	FAM160B2	AFG3L2
[truncated: 65 more columns]

## Sheet: FHIP1AvsHook(1,2,3)
Comaprison of FHIP1A BioID dataset with Hook BioID datasets used to make Figure 2 - Figure supplement 2A (Hook1-BioID2 and Hook3-BioID2 are from Redwine et al. 2017)
Dataset	total	NCBI_Gene
FHIP1A vs. Hook1 vs. Hook2 vs. Hook3	5	KIF5B	KIF5B	AKTIP	KLC4	HOOK3	KLC2
FHIP1A vs. Hook1 vs. Hook2	2	KLC1	HOOK1
FHIP1A vs. Hook1 vs. Hook3	2	FAM160A2	FAM160A1
FHIP1A vs. Hook2 vs. Hook3	1	IGF2R
Hook1 vs. Hook2 vs. Hook3	6	ANKRD28	FAM160B1	FAM91A1	CEP192	SIPA1L3	FAM160B2
FHIP1A vs. Hook1	5	PCCA	ARFGAP2	AP4E1	KIF5C	PCCB
Hook1 vs. Hook2	11	KIAA0232	KIAA1671	PDZRN3	PPP2R3A	N4BP2	SIPA1L2	TBK1	PJA2	CEP350	DYNC1LI1	USP54
Hook1 vs. Hook3	27	FAM21A	HAUS5	NBN	PPP6R3	BCCIP	GPATCH1	CAPZA1	ABI2	PLEC	RAD50	KIF1B	WDR62	ACACA	KIF1C	RELA	TJP2	MYL6	VPS45	ATG2A	TBKBP1	NFKB1	WASF2	FAM21C	KIAA0196	CC2D1A	IFT27
Hook2 vs. Hook3	9	ALMS1	GOLGA5	CEP55	APC	WDR83	PCM1	SSX2IP	CCDC88A	CEP164
FHIP1A	40	ECE1	KLC3	PFDN1	SCAMP3	PFDN6	VBP1	GAPDH	FMC1	CDC42EP1	TFRC	DNAJB6	SSBP1	CLEC16A	SLC38A1	PFDN5	SNX1	ALG1	LGALS3BP	FAM135A	LRP2	SLC39A14	LPCAT1	APPL1	HELZ	ATP9A	SCAMP1	LNPEP	SLC7A5	ERC1	SHMT2	SNX3	ANKRD27	FASTKD5	TMEM161A	UQCRC2	ATP5C1	RAB11FIP1	SNX2	ATP1A1	TOP1
Hook1	45	ANXA2	IFT74	RBSN	SUFU	PPP2R5D	PEX5	GIT1	CCT2	HAUS3	AP4B1	SVIL	SH3GLB1	IFT22	NUP43	RAP1GAP	SIRT2	USP47	VPS13C	IFT46	CDK5	NFKBIE	EIF4ENIF1	AP4M1	DBT	TTC12	MKL2	HAUS1	UNK	FAM83B	ECD	TSC1	PSMC1	SDCCAG3	HAUS4	SEPT9	ALDH1A2	DNMBP	KRT75	TTC26	CLASP1	CTIF	RIMBP3	YWHAE	CCT7	NCKAP1
Hook2	63	RPS25	CCDC138	LPP	VPS51	CEP131	RPS18	CCSER2	LMNA	HOOK2	RPL34	SOGA1	CENPJ	PIBF1	FAU	SREK1IP1	CGNL1	KIF7	ARHGAP29	CCDC14	ANKRD26	NEDD1	TTLL5	CENPE	PPFIA1	DYNC1LI2	MPHOSPH9	NAV1	CEP135	CSPP1	SPICE1	PATJ	MAP3K21	FLII	OFD1	DYNC1H1	SFXN1	LDHA	RGPD5	CEP290	GPN1	SUMO2	CCDC18	SMC3	INTU	PJA1	YBX3	CEP85	SNAPIN
Hook3	42	LTV1	KRT19	GAPVD1	ARHGEF11	TJP1	BSDC1	PPP6C	PPP6R2	COBL	WDR11	TPD52L2	SYNRG	SPAG5	HBS1L	BACH2	STRN	CPD	TBC1D23	FAM120A	LUZP1	OSBPL3	ACACB	BRPF1	AAK1	KIAA0319L	DLG5	CAPZB	AGTPBP1	ZC3H7A	NAP1L4	DVL2	CGN	TOMM40	MAP7D3	DMTN	BCR	AFTPH	CEP97	NAP1L1	PHF8	ANKRD52	CORO1B
[truncated: 15 more columns]

## Sheet: FHIP1BvsHook(1,2,3)
Comaprison of FHIP1B BioID dataset with Hook BioID datasets used to make Figure 2 - Figure supplement 2B (Hook1-BioID2 and Hook3-BioID2 are from Redwine et al. 2017)
Dataset	total	NCBI_Gene
FHIP1B vs. Hook1 vs. Hook2 vs. Hook3	2	AKTIP	HOOK3
FHIP1B vs. Hook1 vs. Hook2	1	HOOK1
FHIP1B vs. Hook1 vs. Hook3	2	FAM160A2	MYL6
FHIP1B vs. Hook2 vs. Hook3	1	IGF2R
Hook1 vs. Hook2 vs. Hook3	9	KLC4	FAM160B1	KLC2	SIPA1L3	FAM160B2	KIF5B	ANKRD28	FAM91A1	CEP192
FHIP1B vs. Hook1	4	AP4B1	AP4M1	DBT	AP4E1
Hook1 vs. Hook2	12	KLC1	TBK1	CEP350	DYNC1LI1	KIAA0232	KIAA1671	PDZRN3	PPP2R3A	N4BP2	SIPA1L2	PJA2	USP54
Hook1 vs. Hook3	27	FAM21A	HAUS5	NBN	PPP6R3	BCCIP	GPATCH1	CAPZA1	ACACA	TJP2	ATG2A	NFKB1	TBKBP1	ABI2	PLEC	RAD50	KIF1B	FAM160A1	WDR62	KIF1C	RELA	VPS45	WASF2	FAM21C	KIAA0196	CC2D1A	IFT27
Hook2 vs. Hook3	9	SSX2IP	CEP164	ALMS1	GOLGA5	CEP55	APC	WDR83	PCM1	CCDC88A
FHIP1B	100	ECE1	ECHS1	UBR5	DECR1	TIMM44	ZFPM2	MRPS35	TNKS2	TRIM33	NDUFS1	GSN	ZNF281	DLST	ZMYM2	EPN2	KMT2D	BLM	ASPM	IRF2BP2	BRCA2	PTBP2	SNX1	YEATS4	PTCD3	UBN1	TPM4	EXO1	TSHZ1	ATP9A	MYH10	LNPEP	KIAA1551	MYO5A	SPEN	NCOR2	MYL12A	TPM1	PYCR1	BCL11A	FANCM	TPM3	SLC6A15	FLG2	PRDM16	RAD54L2	STEAP3	TMOD2	MRPS9
Hook1	46	ANXA2	IFT74	PCCA	SUFU	PPP2R5D	PEX5	GIT1	SVIL	IFT22	SIRT2	USP47	IFT46	CDK5	NFKBIE	TTC12	HAUS1	UNK	FAM83B	TSC1	HAUS4	SEPT9	DNMBP	CLASP1	CTIF	YWHAE	RBSN	ARFGAP2	HAUS3	CCT2	SH3GLB1	NUP43	RAP1GAP	VPS13C	EIF4ENIF1	MKL2	ECD	KIF5C	PSMC1	SDCCAG3	PCCB	ALDH1A2	KRT75	TTC26	RIMBP3	CCT7	NCKAP1
Hook2	63	CCDC138	LPP	VPS51	CEP131	RPS18	CCSER2	SOGA1	CENPJ	FAU	SREK1IP1	CGNL1	KIF7	ANKRD26	CENPE	PPFIA1	MPHOSPH9	CEP135	CSPP1	PATJ	MAP3K21	SFXN1	LDHA	CEP290	SUMO2	SMC3	INTU	YBX3	KIAA0753	CEP152	PLEKHG1	RRP1	NCKAP5L	MTMR4	NIN	RPS25	LMNA	HOOK2	RPL34	PIBF1	ARHGAP29	CCDC14	NEDD1	TTLL5	DYNC1LI2	NAV1	SPICE1	FLII	OFD1
Hook3	42	LTV1	KRT19	GAPVD1	ARHGEF11	PPP6C	COBL	WDR11	TPD52L2	SYNRG	SPAG5	HBS1L	CPD	FAM120A	LUZP1	OSBPL3	ACACB	BRPF1	KIAA0319L	DLG5	ZC3H7A	NAP1L4	DVL2	CGN	TOMM40	MAP7D3	DMTN	BCR	AFTPH	CEP97	TJP1	BSDC1	PPP6R2	BACH2	STRN	TBC1D23	AAK1	CAPZB	AGTPBP1	NAP1L1	PHF8	ANKRD52	CORO1B
[truncated: 52 more columns]

## Sheet: FHIP2AvsHook(1,2,3)
Comaprison of FHIP2A BioID dataset with Hook BioID datasets used to make Figure 2 - Figure supplement 2C (Hook1-BioID2 and Hook3-BioID2 are from Redwine et al. 2017)
Dataset	total	NCBI_Gene
FHIP2A vs. Hook1 vs. Hook2 vs. Hook3	7	AKTIP	KLC4	FAM160B1	HOOK3	KLC2	KIF5B	FAM91A1
FHIP2A vs. Hook1 vs. Hook2	3	KLC1	HOOK1	CEP350
FHIP2A vs. Hook1 vs. Hook3	2	NBN	KIF1B
FHIP2A vs. Hook2 vs. Hook3	3	IGF2R	GOLGA5	APC
Hook1 vs. Hook2 vs. Hook3	4	SIPA1L3	FAM160B2	ANKRD28	CEP192
FHIP2A vs. Hook1	4	PCCA	DBT	KIF5C	RIMBP3
FHIP2A vs. Hook2	3	FAU	HOOK2	DCD
FHIP2A vs. Hook3	7	WDR11	TPD52L2	CPD	BRPF1	KIAA0319L	BSDC1	TBC1D23
Hook1 vs. Hook2	10	TBK1	DYNC1LI1	KIAA0232	KIAA1671	PDZRN3	PPP2R3A	N4BP2	SIPA1L2	PJA2	USP54
Hook1 vs. Hook3	27	FAM21A	HAUS5	PPP6R3	BCCIP	GPATCH1	CAPZA1	ACACA	TJP2	ATG2A	NFKB1	TBKBP1	FAM160A2	ABI2	PLEC	RAD50	FAM160A1	WDR62	KIF1C	RELA	MYL6	VPS45	WASF2	FAM21C	KIAA0196	CC2D1A	IFT27
Hook2 vs. Hook3	7	SSX2IP	CEP164	ALMS1	CEP55	WDR83	PCM1	CCDC88A
FHIP2A	82	TPD52	GOSR2	SLC30A5	TBC1D4	SUMO1	MRPS28	KRT14	RNF40	KRT9	STOM	SNAP47	CLEC16A	KRT77	SLC38A1	VLDLR	RPL36A	BET1L	VANGL1	LRBA	SLC38A2	KRT1	RPL35	DDRGK1	CASP14	ATP6V0A2	LNPEP	ARG1	ZFYVE27	NBEA	SEC24B	KRT5	ARHGAP1	RAB6A	SBSN	SLC30A7	FLG2	TOP2B	DVL1	FABP5	EMD	MED19	SCFD1	ESRRB	VAMP7	KPRP	DSG1	STX5	TPD52L1
Hook1	46	ANXA2	IFT74	SUFU	PPP2R5D	PEX5	GIT1	AP4B1	SVIL	IFT22	SIRT2	USP47	IFT46	CDK5	NFKBIE	AP4M1	TTC12	HAUS1	UNK	FAM83B	TSC1	HAUS4	SEPT9	DNMBP	CLASP1	CTIF	YWHAE	RBSN	ARFGAP2	HAUS3	CCT2	SH3GLB1	NUP43	RAP1GAP	VPS13C	EIF4ENIF1	MKL2	AP4E1	ECD	PSMC1	SDCCAG3	PCCB	ALDH1A2	KRT75	TTC26	CCT7	NCKAP1
Hook2	60	CCDC138	LPP	VPS51	CEP131	RPS18	CCSER2	SOGA1	CENPJ	SREK1IP1	CGNL1	KIF7	ANKRD26	CENPE	PPFIA1	MPHOSPH9	CEP135	CSPP1	PATJ	MAP3K21	SFXN1	LDHA	CEP290	SUMO2	SMC3	INTU	YBX3	KIAA0753	CEP152	PLEKHG1	RRP1	NCKAP5L	MTMR4	NIN	RPS25	LMNA	RPL34	PIBF1	ARHGAP29	CCDC14	NEDD1	TTLL5	DYNC1LI2	NAV1	SPICE1	FLII	OFD1	DYNC1H1	RGPD5
Hook3	35	LTV1	KRT19	GAPVD1	ARHGEF11	PPP6C	COBL	SYNRG	SPAG5	HBS1L	FAM120A	LUZP1	OSBPL3	ACACB	DLG5	ZC3H7A	NAP1L4	DVL2	CGN	TOMM40	MAP7D3	DMTN	BCR	AFTPH	CEP97	TJP1	PPP6R2	BACH2	STRN	AAK1	CAPZB	AGTPBP1	NAP1L1	PHF8	ANKRD52	CORO1B
[truncated: 34 more columns]

## Sheet: FHIP2BvsHook(1,2,3)
Comaprison of FHIP2B BioID dataset with Hook BioID datasets used to make Figure 2 - Figure supplement 2D (Hook1-BioID2 and Hook3-BioID2 are from Redwine et al. 2017)
Dataset	total	NCBI_Gene
FHIP2B vs. Hook1 vs. Hook2 vs. Hook3	8	AKTIP	KLC4	FAM160B1	HOOK3	KLC2	FAM160B2	KIF5B	FAM91A1
FHIP2B vs. Hook1 vs. Hook2	2	KLC1	HOOK1
FHIP2B vs. Hook1 vs. Hook3	2	KIF1B	FAM160A1
FHIP2B vs. Hook2 vs. Hook3	2	IGF2R	GOLGA5
Hook1 vs. Hook2 vs. Hook3	3	SIPA1L3	ANKRD28	CEP192
FHIP2B vs. Hook1	3	DBT	KIF5C	RIMBP3
FHIP2B vs. Hook2	11	RPS18	FAU	SREK1IP1	LDHA	YBX3	RRP1	RPS25	LMNA	HOOK2	RPL34	H1F0
FHIP2B vs. Hook3	4	CPD	KIAA0319L	BSDC1	TBC1D23
Hook1 vs. Hook2	11	TBK1	CEP350	DYNC1LI1	KIAA0232	KIAA1671	PDZRN3	PPP2R3A	N4BP2	SIPA1L2	PJA2	USP54
Hook1 vs. Hook3	27	FAM21A	HAUS5	NBN	PPP6R3	BCCIP	GPATCH1	CAPZA1	ACACA	TJP2	ATG2A	NFKB1	TBKBP1	FAM160A2	ABI2	PLEC	RAD50	WDR62	KIF1C	RELA	MYL6	VPS45	WASF2	FAM21C	KIAA0196	CC2D1A	IFT27
Hook2 vs. Hook3	8	SSX2IP	CEP164	ALMS1	CEP55	APC	WDR83	PCM1	CCDC88A
FHIP2B	126	USP30	SUPV3L1	NDUFS6	ECHS1	PDHA1	NDUFS2	GFM2	POLRMT	MRPS7	GLS	TIMM44	GLUD1	VAPB	CHCHD3	AARS2	PDK1	FMC1	NDUFS1	NDUFA6	DLST	NDUFAF4	PPA2	DLD	ATP5F1B	ACADM	PTCD3	ECH1	IARS2	MRPL3	ACAD9	PTPMT1	TRAK1	ACSL3	NDUFA12	PTCD1	NDUFA9	HADHA	AKAP1	GFM1	ANKRD27	FASTKD5	C17orf80	NDUFAF2	PRPS1	MRPS22	ST13	HSPA9	WARS2
Hook1	47	ANXA2	IFT74	PCCA	SUFU	PPP2R5D	PEX5	GIT1	AP4B1	SVIL	IFT22	SIRT2	USP47	IFT46	CDK5	NFKBIE	AP4M1	TTC12	HAUS1	UNK	FAM83B	TSC1	HAUS4	2021-09-09	DNMBP	CLASP1	CTIF	YWHAE	RBSN	ARFGAP2	HAUS3	CCT2	SH3GLB1	NUP43	RAP1GAP	VPS13C	EIF4ENIF1	MKL2	AP4E1	ECD	PSMC1	SDCCAG3	PCCB	ALDH1A2	KRT75	TTC26	CCT7	NCKAP1
Hook2	52	CCDC138	LPP	VPS51	CEP131	CCSER2	SOGA1	CENPJ	CGNL1	KIF7	ANKRD26	CENPE	PPFIA1	MPHOSPH9	CEP135	CSPP1	PATJ	MAP3K21	SFXN1	CEP290	SUMO2	SMC3	INTU	KIAA0753	CEP152	PLEKHG1	NCKAP5L	MTMR4	NIN	PIBF1	ARHGAP29	CCDC14	NEDD1	TTLL5	DYNC1LI2	NAV1	SPICE1	FLII	OFD1	DYNC1H1	RGPD5	GPN1	CCDC18	PJA1	CEP85	SNAPIN	PDLIM5	CYLD	PCNT
Hook3	38	LTV1	KRT19	GAPVD1	ARHGEF11	PPP6C	COBL	WDR11	TPD52L2	SYNRG	SPAG5	HBS1L	FAM120A	LUZP1	OSBPL3	ACACB	BRPF1	DLG5	ZC3H7A	NAP1L4	DVL2	CGN	TOMM40	MAP7D3	DMTN	BCR	AFTPH	CEP97	TJP1	PPP6R2	BACH2	STRN	AAK1	CAPZB	AGTPBP1	NAP1L1	PHF8	ANKRD52	CORO1B
[truncated: 125 more columns]
